# Supplementary material
Source: PubMed Central journal article supplement (PMC3974235)

## Supplementary material:

**Table 1:** Summary of structural differences between b2a2 and b3a2 isoforms.

| Secondary Structure Element | Position of structural element in b2a2 | Position of structural element in b3a2 |
|-----------------------------|----------------------------------------|----------------------------------------|
| $\alpha_{25}$               | Pro780 - Glu801                        | Glu 782 - Lys 802                      |
| $\alpha'$                   | absent                                 | Pro 812 - Glu 827                      |
| $\alpha_{26}$               | Tyr 852 - Lys 866                      | Arg 854 - Lys 866                      |
| $\alpha_{27}$               | Glu 878 - Met 881                      | Val 877 - Gln 890                      |
| $\alpha_{29}$               | Arg 1010 - Leu 1017                    | Arg 1035 - Ser 1043                    |
| $\beta_{12}$                | Lys 815 - Leu 818                      | absent                                 |
| $\beta_{13}$                | Phe 834 - Ser 838                      | Ala 833 - His 837                      |
| $\beta_{15}$                | Val 887 - Gln 890                      | Thr 891 - His 893                      |
| $\beta'$                    | absent                                 | Ile 983 - Thr 984                      |
| $\beta_{17}$                | Lys 963 - Leu 967                      | Lys 988 - Gly 993                      |
| $\beta_{30}$                | Ser 1261 - Leu 1263                    | Leu 1285 - Leu 1288                    |
| $\beta''$                   | absent                                 | between Asn1671 and Arg1672            |
| $\beta_{34}$                | Ser 1735 - Pro 1738                    | Gly 1761 - Pro 1763                    |
| $\beta_{35}$                | Lys 1755 - His 1756                    | absent                                 |

**Schematic 1:** Comparison of secondary structure elements of b2a2 and b3a2 protein isoforms obtained by the use of Psipred. The 25 amino acid insertion just before Ala 904 in the sequence of b3a2 is underlined in red (the panels are numbered 1-11 according to the order in which they appear).

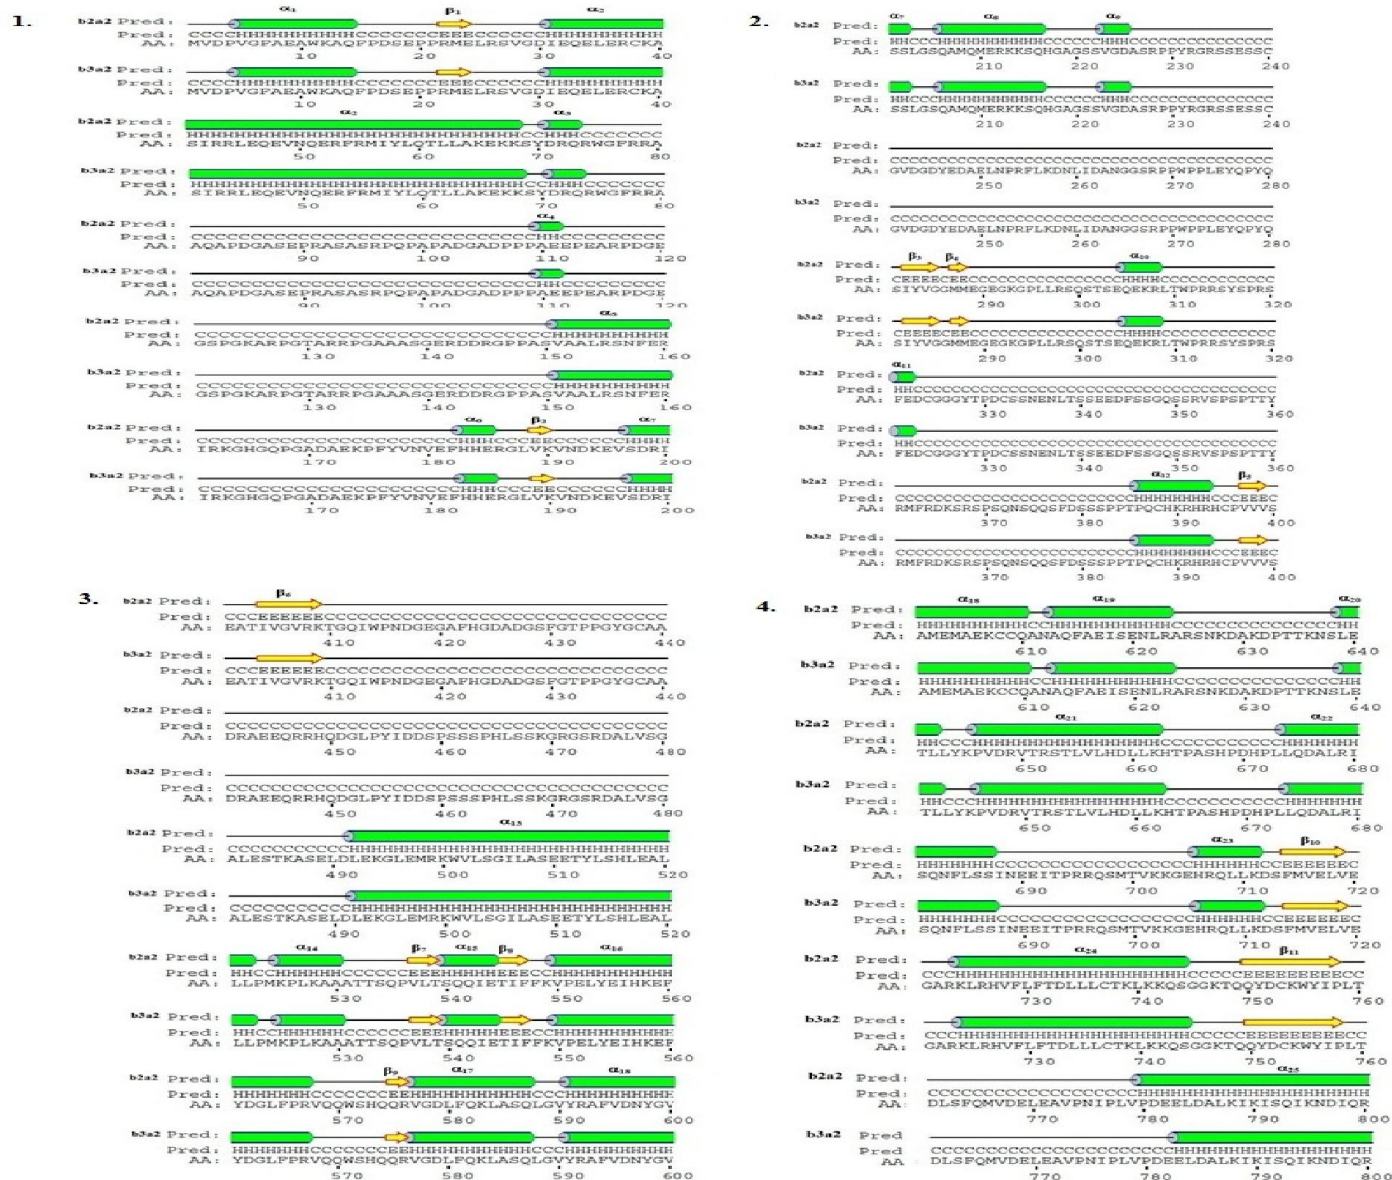

Supplement: 97320630010108S1.pdf [file 97320630010108S1.pdf]
